# Supplementary material for: Placing Salt/Soy Sauce at Dining Tables and Out-Of-Home Behavior Are Related to Urinary Sodium Excretion in Japanese Secondary School Students
Source: PubMed Central journal article supplement (PMC5748741; doi:10.3390/nu9121290), 2017-11-28
Supplement: nutrients-09-01290-s001.pdf [file nutrients-09-01290-s001.pdf]

## Supplementary Information

### *Measured 24 h Na Excretion*

Sampling and analysis methods have been described in detail previously [3]. Briefly, 68 students collected 24 h urine samples twice at an interval of 1 or 2 weeks to derive a formula for estimating 24 h Na excretion. After the first void in the morning on the first day was discarded, the student collected all voids in plastic bottles until the first void next morning. The students recorded the time of each void. The students brought 24 h urines samples in plastic bottles to their schools, and we measured total volume, took 7–8 ml of each sample in a test tube, and refrigerated it until urinalysis. The urinalysis method was the same as that employed for the overnight urine samples. The amount of 24 h sodium (24 h Na; mmol/d) excretion was calculated as follows:

$$\text{Measured Na excretion (mmol/d)} = \text{Na concentration of collected urine (mmol/L)} \times \text{urine volume of collected urine (ml)} \times 24 \text{ (h)/collection period (h)}. \quad (1)$$

Measured 24 h Na excretion was calculated using Equation (1) for each 24 h urine collection. An average of the two measurements from each person was used as an individual value. Excluding 2 subjects with incomplete questionnaire, 66 subjects were included for statistical analysis.

**Table S1.** Measured Na excretion ( $n = 66$ ).

|                                    |                          | <i>n</i> | Mean  | (Standard deviation) | <i>p</i> for trend <sup>1</sup> |
|------------------------------------|--------------------------|----------|-------|----------------------|---------------------------------|
| Salt placed at dining table        | Often                    | 7        | 166.9 | (39.0)               | 0.61                            |
|                                    | Sometimes                | 8        | 165.8 | (53.5)               |                                 |
|                                    | Rarely                   | 8        | 138.3 | (40.7)               |                                 |
|                                    | Never                    | 42       | 155.8 | (46.7)               |                                 |
| Soy sauce placed at dining table   | Often                    |          | 154.9 | (39.0)               | 0.55                            |
|                                    | Sometimes                | 18       | 151.0 | (45.3)               |                                 |
|                                    | Rarely                   | 15       | 166.7 | (45.0)               |                                 |
|                                    | Never                    | 16       | 151.8 | (55.2)               |                                 |
| Health effect of salt              | Disagree                 | 17       | 141.1 | (34.1)               | 0.18                            |
|                                    | Agree                    | 8        | 158.2 | (47.0)               |                                 |
| Salt intake appropriate for health | High                     | 58       | 147.2 | (45.3)               | 0.46                            |
|                                    | Not high                 | 22       | 160.6 | (45.9)               |                                 |
| Japanese intake                    | Higher than others       | 44       | 151.4 | (45.9)               | 0.68                            |
|                                    | Not higher               | 38       | 162.4 | (45.7)               |                                 |
| Discretionary seasoning use        | Often                    | 28       | 160.1 | (43.3)               | 0.67                            |
|                                    | Sometimes                | 5        | 141.2 | (50.7)               |                                 |
|                                    | Rarely                   | 13       | 171.0 | (38.8)               |                                 |
|                                    | Never                    | 23       | 149.3 | (48.1)               |                                 |
| Add seasoning on foods             | ≤2 foods                 | 25       | 149.8 | (41.6)               | 0.72                            |
|                                    | 3                        | 13       | 123.3 | (15.5)               |                                 |
|                                    | 4                        | 6        | 155.8 | (44.4)               |                                 |
|                                    | 5                        | 17       | 178.4 | (51.1)               |                                 |
|                                    | ≥6                       | 18       | 146.3 | (44.2)               |                                 |
| Convenience stores                 | ≥2/week                  | 4        | 148.9 | (66.5)               | 0.94                            |
|                                    | 1/week                   | 8        | 149.3 | (32.5)               |                                 |
|                                    | <1/week and ≥1/month     | 20       | 162.7 | (50.6)               |                                 |
|                                    | <1/month                 | 21       | 154.3 | (35.9)               |                                 |
| Restaurant                         | Did not buy              | 13       | 155.2 | (57.6)               | 0.03                            |
|                                    | >2/month                 | 5        | 195.0 | (23.5)               |                                 |
|                                    | 2/month                  | 12       | 166.2 | (40.4)               |                                 |
|                                    | 1/month                  | 14       | 149.1 | (40.5)               |                                 |
|                                    | <1/month and ≥1/6 months | 23       | 162.9 | (52.5)               |                                 |
|                                    | <1/6 months              | 12       | 125.0 | (32.9)               |                                 |

<sup>1</sup> Adjusted for grade, sex, parent's education, moderate and vigorous physical activity, and body mass index.

**Table S2.** Effect of interaction terms with sex on estimated Na excretion ( $n = 267$ ).

|                                    | <i>p</i> |
|------------------------------------|----------|
| Salt placed at dining table        | 0.882    |
| Soy sauce placed at dining table   | 0.907    |
| Health effect of salt              | 0.929    |
| Salt intake appropriate for health | 0.917    |
| Japanese intake                    | 0.955    |
| Discretionary seasoning use        | 0.019    |
| Add seasoning on foods             | 0.525    |
| Convenience stores                 | 0.917    |
| Restaurants                        | 0.893    |

Other covariates were grade, parent's education, and body mass index.

**Table S3.** Estimated Na excretion in boys ( $n = 128$ ).

|                                    |                          | <i>n</i> | Mean  | (Standard deviation) | Model 1<br><i>p</i> <sub>for trend</sub> <sup>1</sup> | Model 2<br><i>p</i> <sub>for trend</sub> <sup>2</sup> | Model 3<br><i>p</i> <sub>for trend</sub> <sup>3</sup> |
|------------------------------------|--------------------------|----------|-------|----------------------|-------------------------------------------------------|-------------------------------------------------------|-------------------------------------------------------|
| Salt placed at dining table        | Often                    | 23       | 170.6 | (20.5)               |                                                       |                                                       |                                                       |
|                                    | Sometimes                | 13       | 158.7 | (29.9)               | 0.04                                                  | 0.03                                                  | 0.02                                                  |
|                                    | Rarely                   | 31       | 163.4 | (22.3)               |                                                       |                                                       |                                                       |
|                                    | Never                    | 61       | 158.3 | (19.9)               |                                                       |                                                       |                                                       |
| Soy sauce placed at dining table   | Often                    | 50       | 166.7 | (23.3)               |                                                       |                                                       |                                                       |
|                                    | Sometimes                | 32       | 157.3 | (21.2)               | 0.17                                                  | 0.17                                                  | 0.17                                                  |
|                                    | Rarely                   | 20       | 158.6 | (25.2)               |                                                       |                                                       |                                                       |
|                                    | Never                    | 26       | 160.2 | (16.3)               |                                                       |                                                       |                                                       |
| Health effect of salt              | Disagree                 | 37       | 163.3 | (21.6)               | 0.63                                                  | 0.84                                                  | 0.69                                                  |
|                                    | Agree                    | 91       | 161.2 | (22.3)               |                                                       |                                                       |                                                       |
| Salt intake appropriate for health | High                     | 56       | 162.3 | (20.0)               | 0.80                                                  | 0.89                                                  | 0.98                                                  |
|                                    | Not high                 | 72       | 161.4 | (23.5)               |                                                       |                                                       |                                                       |
| Japanese intake                    | Higher than others       | 82       | 161.5 | (18.6)               | 0.83                                                  | 0.57                                                  | 0.57                                                  |
|                                    | Not higher               | 46       | 162.3 | (27.2)               |                                                       |                                                       |                                                       |
| Discretionary sauce use            | Often                    | 14       | 156.9 | (16.2)               |                                                       |                                                       |                                                       |
|                                    | Sometimes                | 36       | 160.3 | (25.4)               | 0.37                                                  | 0.38                                                  | 0.62                                                  |
|                                    | Rarely                   | 36       | 164.2 | (25.7)               |                                                       |                                                       |                                                       |
|                                    | Never                    | 42       | 162.6 | (16.9)               |                                                       |                                                       |                                                       |
| Add seasoning on foods             | ≤2 foods                 | 30       | 157.6 | (23.9)               |                                                       |                                                       |                                                       |
|                                    | 3                        | 23       | 156.2 | (23.4)               |                                                       |                                                       |                                                       |
|                                    | 4                        | 33       | 165.7 | (16.6)               | 0.14                                                  | 0.14                                                  | 0.17                                                  |
|                                    | 5                        | 19       | 167.5 | (28.0)               |                                                       |                                                       |                                                       |
|                                    | ≥6                       | 23       | 162.5 | (18.5)               |                                                       |                                                       |                                                       |
| Convenience stores                 | ≥2/week                  | 19       | 165.8 | (24.6)               |                                                       |                                                       |                                                       |
|                                    | 1/week                   | 26       | 163.4 | (21.8)               |                                                       |                                                       |                                                       |
|                                    | <1/week and ≥1/month     | 29       | 166.4 | (23.4)               | 0.13                                                  | 0.10                                                  | 0.09                                                  |
|                                    | <1/month                 | 35       | 155.7 | (21.4)               |                                                       |                                                       |                                                       |
|                                    | Did not buy              | 19       | 159.7 | (17.4)               |                                                       |                                                       |                                                       |
| Restaurant                         | >2/month                 | 18       | 169.5 | (26.8)               |                                                       |                                                       |                                                       |
|                                    | 2/month                  | 26       | 166.0 | (19.0)               |                                                       |                                                       |                                                       |
|                                    | 1/month                  | 35       | 159.6 | (24.2)               | 0.07                                                  | 0.11                                                  | 0.08                                                  |
|                                    | <1/month and ≥1/6 months | 27       | 156.2 | (18.7)               |                                                       |                                                       |                                                       |
|                                    | <1/6 months              | 22       | 160.8 | (20.3)               |                                                       |                                                       |                                                       |

<sup>1</sup> Model 1 was a crude model, <sup>2</sup> Model 2 was adjusted for grade, and parent's education, and <sup>3</sup> Model 3 was adjusted for grade, parent's education, and body mass index.

**Table S4.** Estimated Na excretion in girls ( $n = 139$ ).

|                                    |                          | <i>n</i> | Mean  | (Standard deviation) | Model 1<br><i>p</i> <sub>for trend</sub> <sup>1</sup> | Model 2<br><i>p</i> <sub>for trend</sub> <sup>2</sup> | Model 3<br><i>p</i> <sub>for trend</sub> <sup>3</sup> |
|------------------------------------|--------------------------|----------|-------|----------------------|-------------------------------------------------------|-------------------------------------------------------|-------------------------------------------------------|
| Salt placed at dining table        | Often                    | 25       | 160.5 | (19.2)               |                                                       |                                                       |                                                       |
|                                    | Sometimes                | 10       | 160.1 | (13.1)               | 0.01                                                  | 0.04                                                  | 0.04                                                  |
|                                    | Rarely                   | 25       | 157.5 | (22.2)               |                                                       |                                                       |                                                       |
|                                    | Never                    | 79       | 148.9 | (21.9)               |                                                       |                                                       |                                                       |
| Soy sauce placed at dining table   | Often                    | 45       | 157.3 | (20.3)               |                                                       |                                                       |                                                       |
|                                    | Sometimes                | 24       | 155.0 | (19.4)               | 0.03                                                  | 0.09                                                  | 0.09                                                  |
|                                    | Rarely                   | 29       | 155.2 | (20.9)               |                                                       |                                                       |                                                       |
|                                    | Never                    | 41       | 146.6 | (23.2)               |                                                       |                                                       |                                                       |
| Health effect of salt              | Disagree                 | 16       | 156.7 | (22.6)               | 0.50                                                  | 0.85                                                  | 0.81                                                  |
|                                    | Agree                    | 123      | 152.9 | (21.3)               |                                                       |                                                       |                                                       |
| Salt intake appropriate for health | High                     | 48       | 152.7 | (20.5)               | 0.81                                                  | 0.63                                                  | 0.62                                                  |
|                                    | Not high                 | 91       | 153.6 | (22.0)               |                                                       |                                                       |                                                       |
| Japanese intake                    | Higher than others       | 84       | 151.5 | (21.7)               | 0.21                                                  | 0.36                                                  | 0.33                                                  |
|                                    | Not higher               | 55       | 156.2 | (20.9)               |                                                       |                                                       |                                                       |
| Discretionary sauce use            | Often                    | 7        | 165.1 | (9.7)                |                                                       |                                                       |                                                       |
|                                    | Sometimes                | 29       | 156.4 | (23.1)               | 0.00                                                  | 0.02                                                  | 0.02                                                  |
|                                    | Rarely                   | 47       | 158.3 | (20.2)               |                                                       |                                                       |                                                       |
|                                    | Never                    | 56       | 146.1 | (20.7)               |                                                       |                                                       |                                                       |
| Add seasoning on foods             | ≤2 foods                 | 30       | 148.1 | (23.0)               |                                                       |                                                       |                                                       |
|                                    | 3                        | 21       | 146.4 | (22.9)               |                                                       |                                                       |                                                       |
|                                    | 4                        | 31       | 153.4 | (17.6)               | 0.00                                                  | 0.01                                                  | 0.01                                                  |
|                                    | 5                        | 27       | 154.8 | (20.1)               |                                                       |                                                       |                                                       |
|                                    | ≥6                       | 30       | 162.0 | (21.6)               |                                                       |                                                       |                                                       |
| Convenience stores                 | ≥2/week                  | 5        | 164.7 | (13.4)               |                                                       |                                                       |                                                       |
|                                    | 1/week                   | 19       | 155.0 | (20.9)               |                                                       |                                                       |                                                       |
|                                    | <1/week and ≥1/month     | 37       | 154.6 | (25.4)               | 0.03                                                  | 0.27                                                  | 0.26                                                  |
|                                    | <1/month                 | 42       | 158.0 | (16.6)               |                                                       |                                                       |                                                       |
|                                    | Did not buy              | 36       | 144.1 | (21.0)               |                                                       |                                                       |                                                       |
| Restaurant                         | >2/month                 | 16       | 157.2 | (18.9)               |                                                       |                                                       |                                                       |
|                                    | 2/month                  | 29       | 160.3 | (24.8)               |                                                       |                                                       |                                                       |
|                                    | 1/month                  | 31       | 153.4 | (18.9)               | 0.01                                                  | 0.09                                                  | 0.10                                                  |
|                                    | <1/month and ≥1/6 months | 43       | 153.1 | (22.8)               |                                                       |                                                       |                                                       |
|                                    | <1/6 months              | 20       | 140.6 | (13.4)               |                                                       |                                                       |                                                       |

<sup>1</sup> Model 1 was a crude model; <sup>2</sup> Model 2 was adjusted for grade, and parent's education; <sup>3</sup> Model 3 was adjusted for grade, parent's education, and body mass index.
